# Supplementary material for: Synergistic catalysis over Ni/ZrOx for hydrogen production from hydrolysis of ammonia borane
Source: Royal Society of Chemistry journal article supplement (doi:10.1039/d2re00509c), 2023-01-01
Supplement: d2re00509c1.pdf [file d2re00509c1.pdf]

## Electronic Supplementary Information

### Synergistic catalysis in Ni/ZrO<sub>x</sub> for hydrogen production from hydrolysis of ammonia borane

Yong Li,<sup>a,b</sup> Shijie Zhou,<sup>a</sup> Xingyue Yang,<sup>a</sup> Enze Xu,<sup>a</sup> Zhen Ren,<sup>a</sup> Lei Wang,<sup>a</sup> and Yusen Yang<sup>\*a</sup>

<sup>a</sup> State Key Laboratory of Chemical Resource Engineering, Beijing Advanced Innovation Center for Soft Matter Science and Engineering, Beijing University of Chemical Technology, Beijing 100029, P. R. China

<sup>b</sup> Grease Branch, Sinopec Lubricant CO., LTD, Tianjin 300480, P. R. China

#### Author Information

\* Corresponding author. Tel: +86-10-64412131; Fax: +86-10-64425385.

E-mail address: [yangyusen@mail.buct.edu.cn](mailto:yangyusen@mail.buct.edu.cn) (Y. Yang).

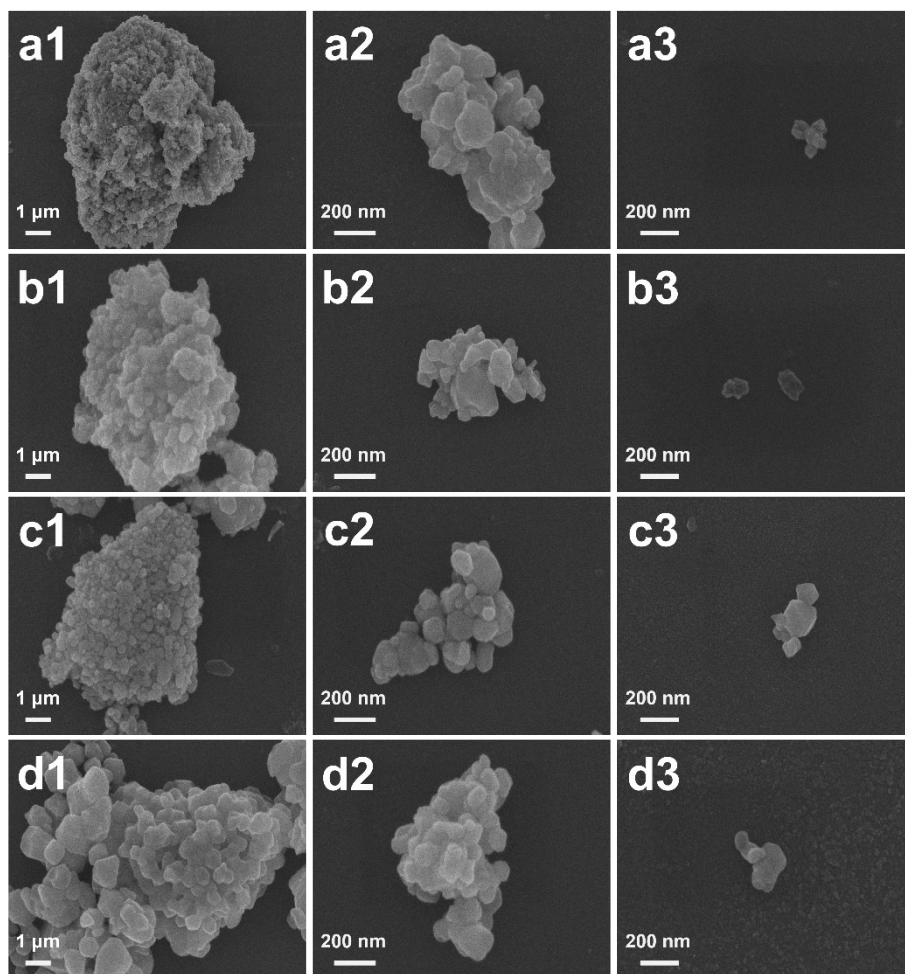

**Fig. S1.** SEM images of the as-synthesized ZrO<sub>x</sub>-T samples: (a1–a3) ZrO<sub>x</sub>-300, (b1–b3) ZrO<sub>x</sub>-400, (c1–c3) ZrO<sub>x</sub>-500 and (d1–d3) ZrO<sub>x</sub>-600, respectively.

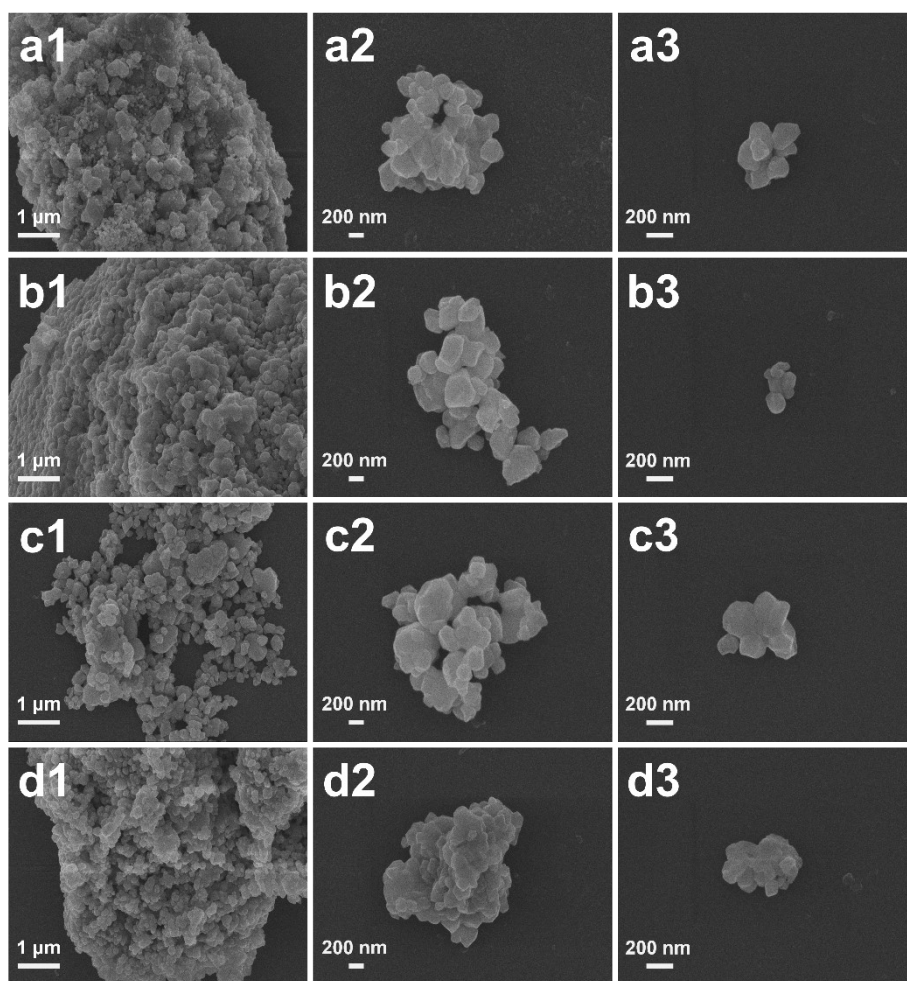

**Fig. S2.** SEM images of the as-synthesized Ni/ZrO<sub>x</sub>-T samples: (a1–a3) Ni/ZrO<sub>x</sub>-300, (b1–b3) Ni/ZrO<sub>x</sub>-400, (c1–c3) Ni/ZrO<sub>x</sub>-500 and (d1–d3) Ni/ZrO<sub>x</sub>-600, respectively.

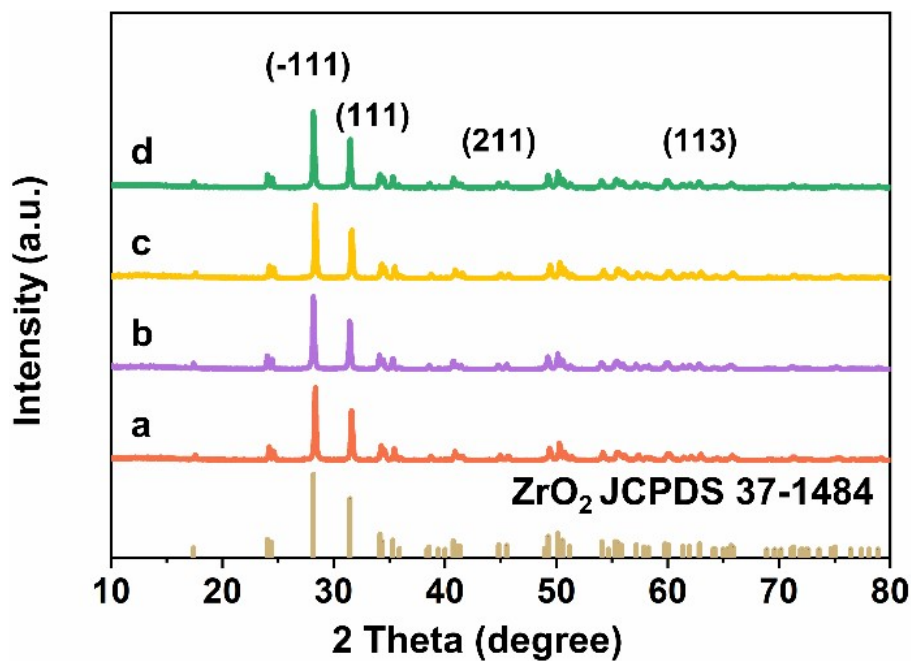

**Fig. S3.** XRD patterns of the as-synthesized ZrO<sub>x</sub>-T samples: (a) ZrO<sub>x</sub>-300, (b) ZrO<sub>x</sub>-400, (c) ZrO<sub>x</sub>-500 and (d) ZrO<sub>x</sub>-600. XRD standard card for ZrO<sub>2</sub> is shown in the lower part of panel: ZrO<sub>2</sub>-PDF#37-1484.

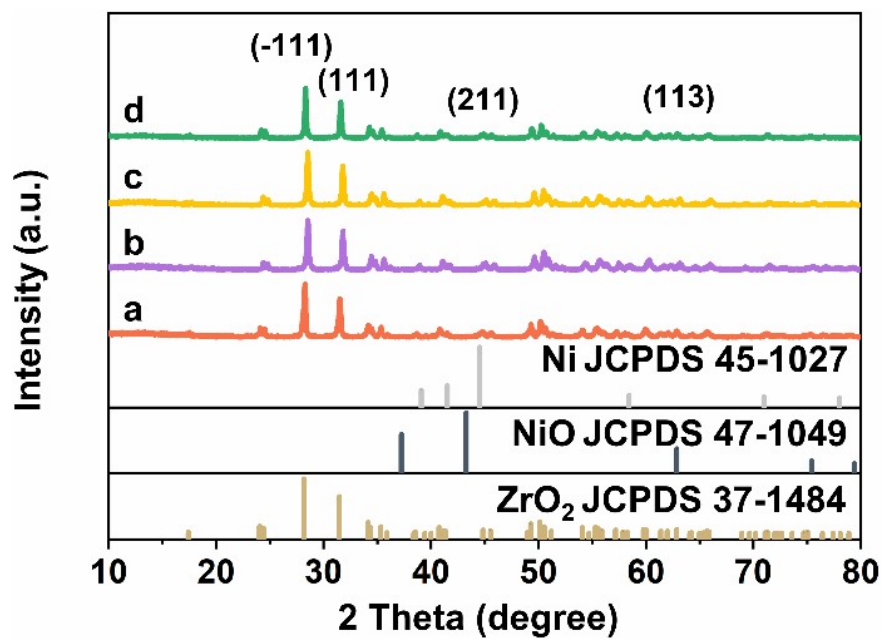

**Fig. S4.** XRD patterns of the as-synthesized Ni/ZrO<sub>x</sub>-T samples: (a) Ni/ZrO<sub>x</sub>-300, (b) Ni/ZrO<sub>x</sub>-400, (c) Ni/ZrO<sub>x</sub>-500 and (d) Ni/ZrO<sub>x</sub>-600. XRD standard cards for Ni, NiO and ZrO<sub>2</sub> are shown in the lower part of the panel: Ni-PDF#45-1027, NiO-PDF#47-1049 and ZrO<sub>2</sub>-PDF#37-1484.

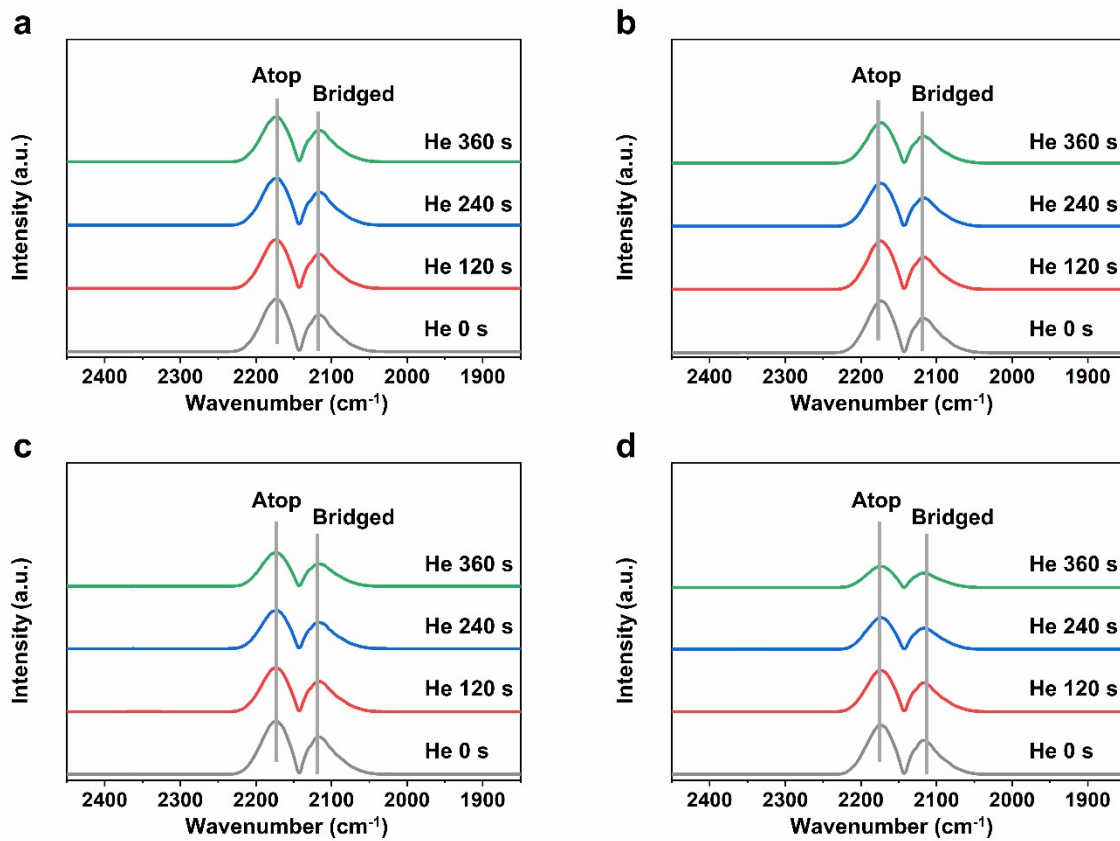

**Fig. S5.** *In situ* FT-IR spectra of CO chemisorption on (a) Ni/ZrO<sub>x</sub>-300, (b) Ni/ZrO<sub>x</sub>-400, (c) Ni/ZrO<sub>x</sub>-500 and (d) Ni/ZrO<sub>x</sub>-600 by flowing He as a purge gas after 0, 120, 240 and 360 s, respectively.

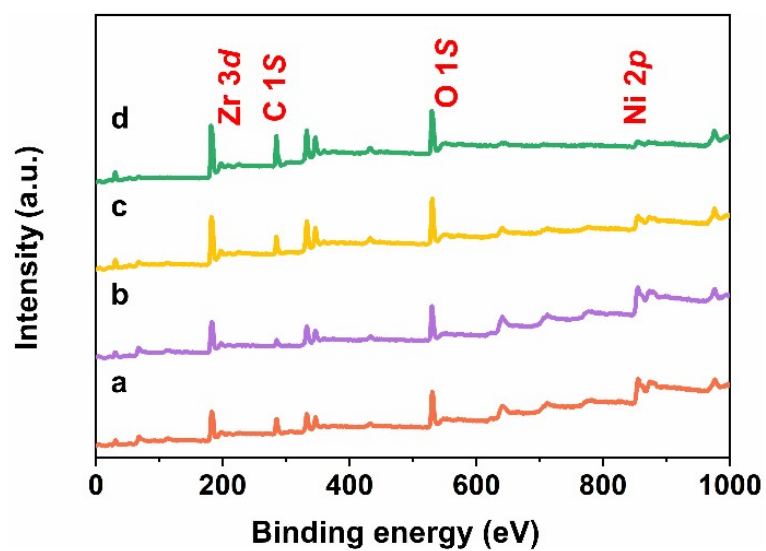

**Fig. S6.** XPS spectra of (a) Ni/ZrO<sub>x</sub>-300, (b) Ni/ZrO<sub>x</sub>-400, (c) Ni/ZrO<sub>x</sub>-500 and (d) Ni/ZrO<sub>x</sub>-600, respectively.

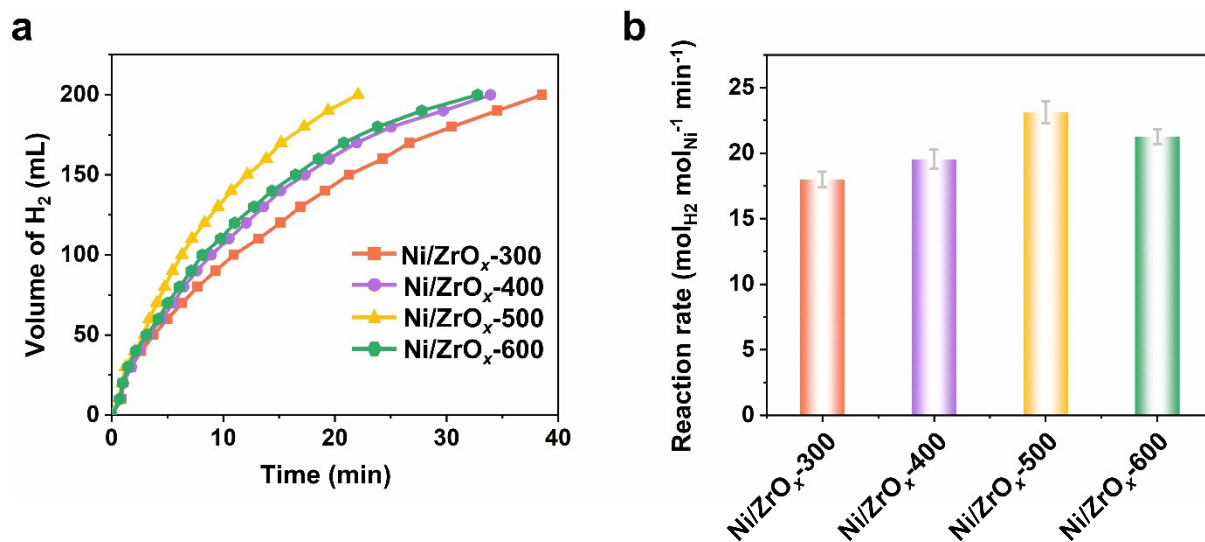

**Fig. S7.** (a) Plot of volume of H<sub>2</sub> vs. reaction time without NaOH for Ni/ZrO<sub>x</sub>-T samples, and (b) the corresponding reaction rate values. Reaction conditions: (a) AB: 3.0 mmol, NaOH: 0 mmol, H<sub>2</sub>O: 10 mL, catalyst: 40.0 mg, temperature: 25 °C.



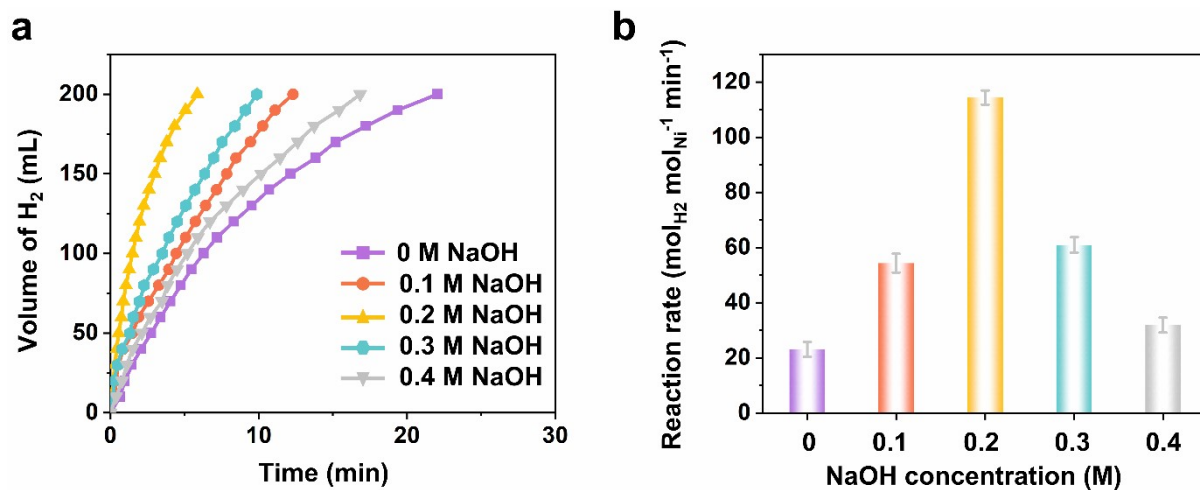

**Fig. S8.** (a) Plot of volume of H<sub>2</sub> vs. reaction time for Ni/ZrO<sub>x</sub>-500 with different NaOH concentrations (0–4 M). (b) Effect of NaOH concentration on the reaction rate for Ni/ZrO<sub>x</sub>-500. Reaction conditions: (a) AB: 3.0 mmol, NaOH: 0–40 mmol, H<sub>2</sub>O: 10 mL, catalyst: 40.0 mg, temperature: 25 °C.

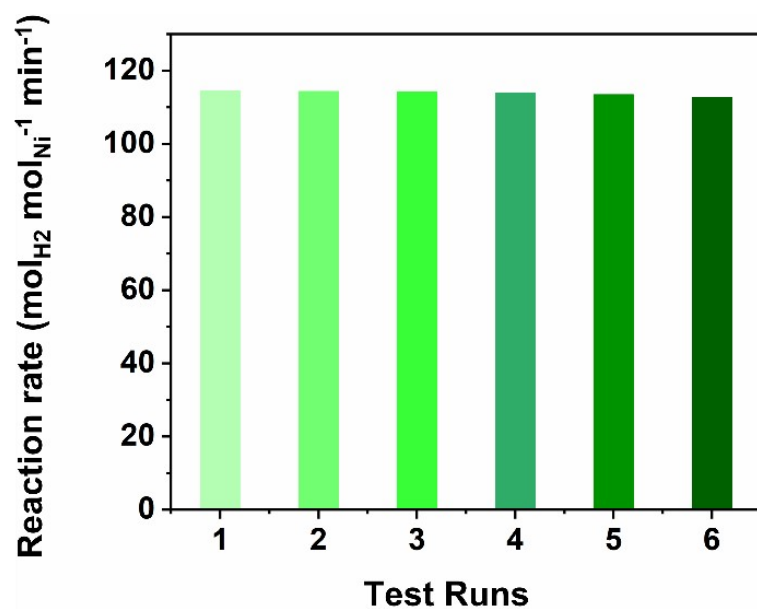

**Fig. S9.** Reaction rate of AB hydrolysis vs. recycling times over Ni/ZrO<sub>x</sub>-500.

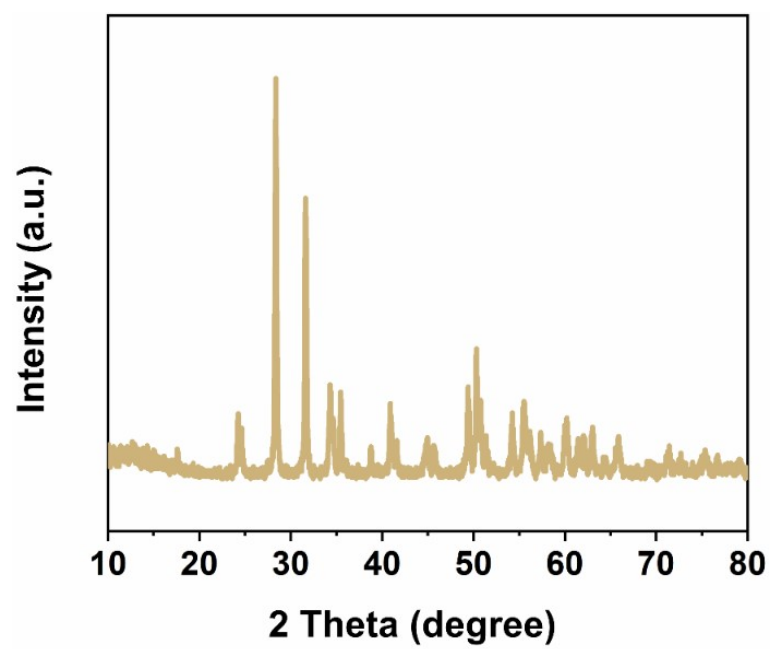

**Fig. S10.** XRD pattern of the used Ni/ZrO<sub>x</sub>-500 sample.

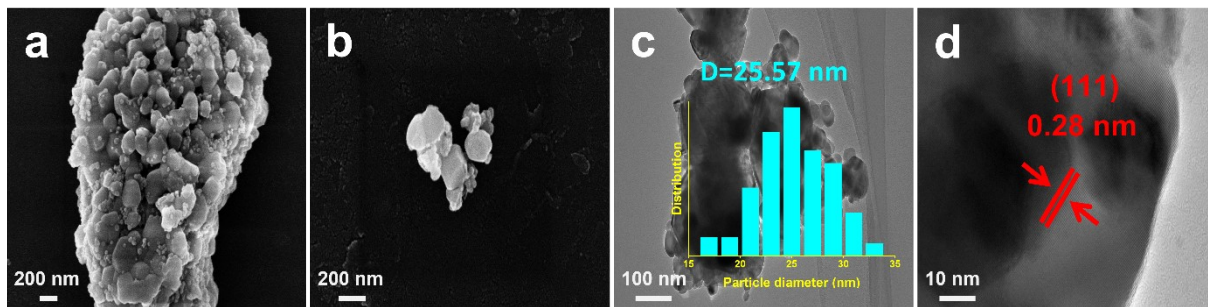

**Fig. S11.** (a–b) SEM images and (c–d) HR-TEM images of the used Ni/ZrO<sub>x</sub>-500 sample with corresponding HR-TEM lattice fringe images.

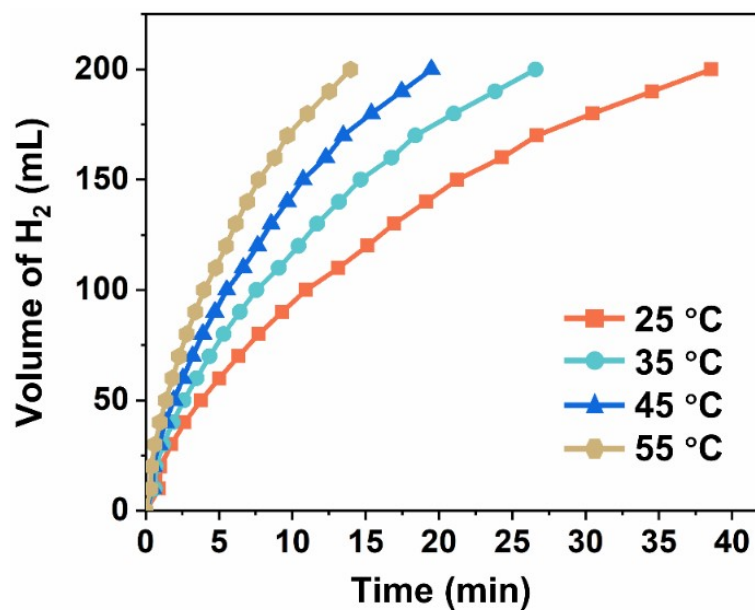

**Fig. S12.** Plot of volume of H<sub>2</sub> vs. reaction time for Ni/ZrO<sub>x</sub>-300 under different reaction temperature (25–55 °C).

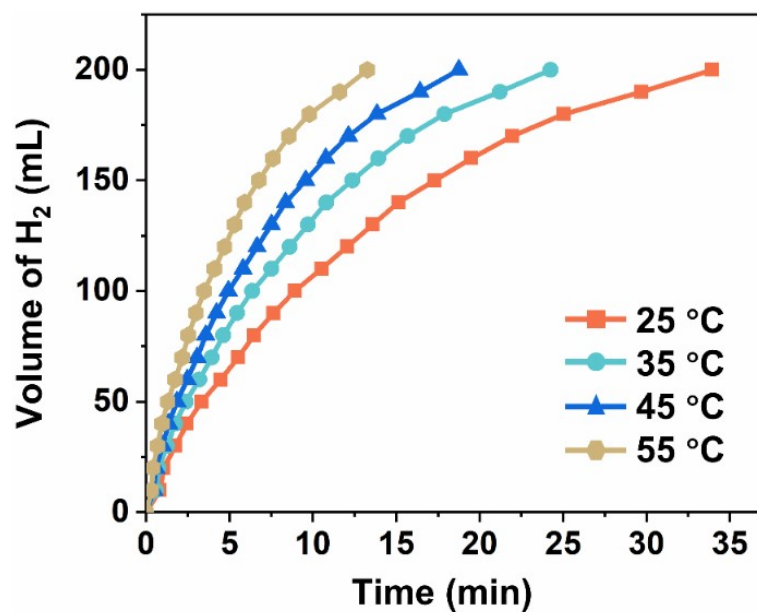

**Fig. S13.** Plot of volume of H<sub>2</sub> vs. reaction time for Ni/ZrO<sub>x</sub>-400 under different reaction temperature (25–55 °C).

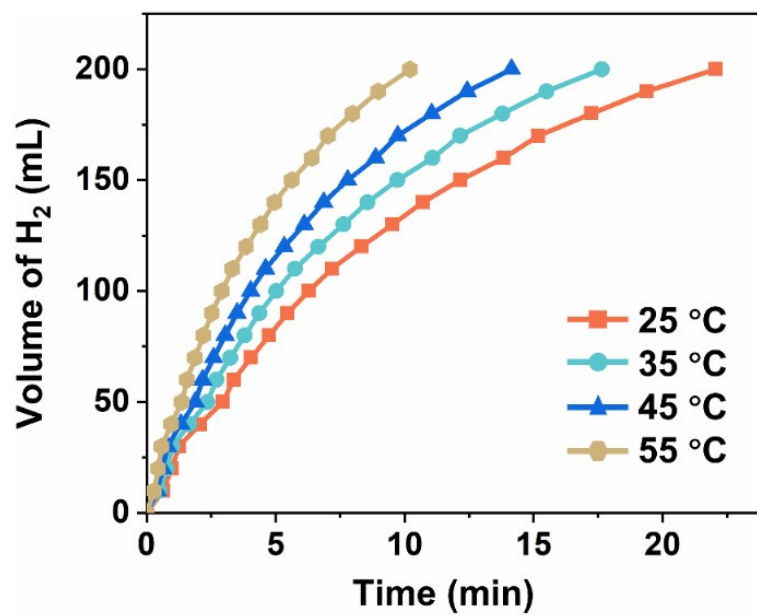

**Fig. S14.** Plot of volume of H<sub>2</sub> vs. reaction time for Ni/ZrO<sub>x</sub>-500 under different reaction temperature (25–55 °C).

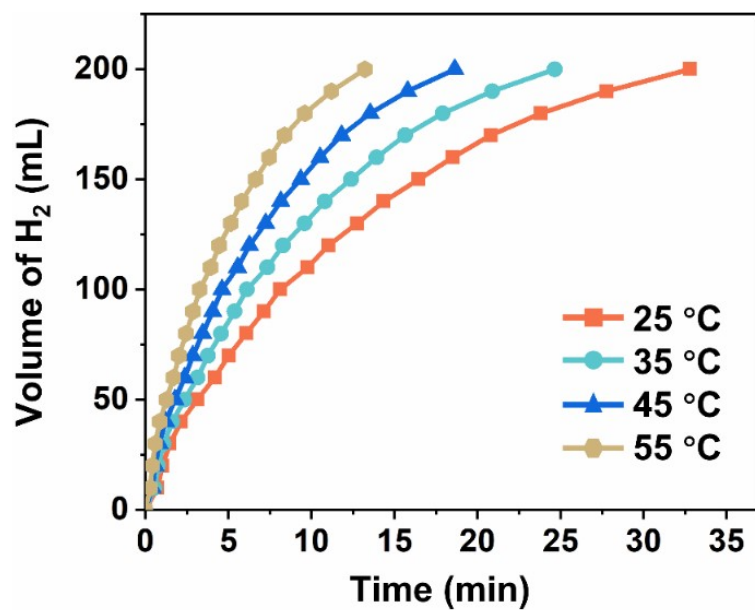

**Fig. S15.** Plot of volume of H<sub>2</sub> vs. reaction time for Ni/ZrO<sub>x</sub>-600 under different reaction temperature (25–55 °C).



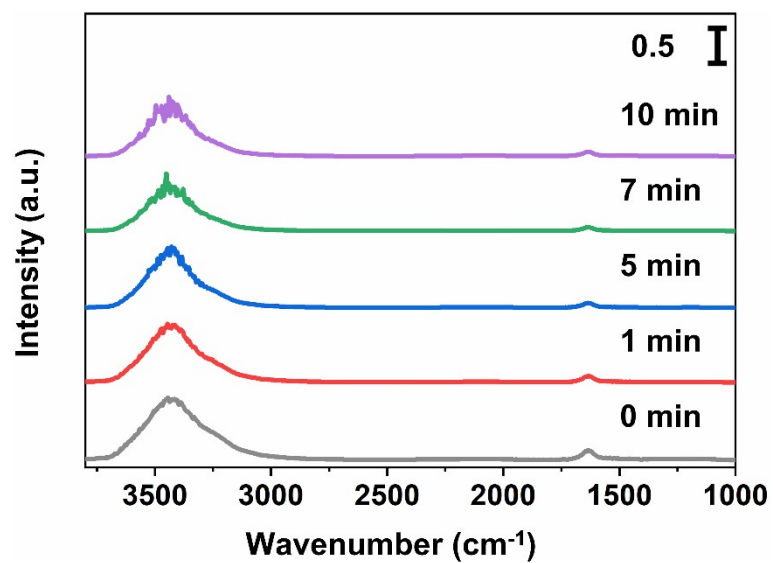

**Fig. S16.** *In situ* FT-IR spectra of AB hydrolysis reaction on ZrO<sub>x</sub>-500 sample recorded in 3800–1000 cm<sup>-1</sup> by flowing AB solution as a reaction gas and He as a purge gas after 0, 1, 5, 7 and 10 min, respectively.

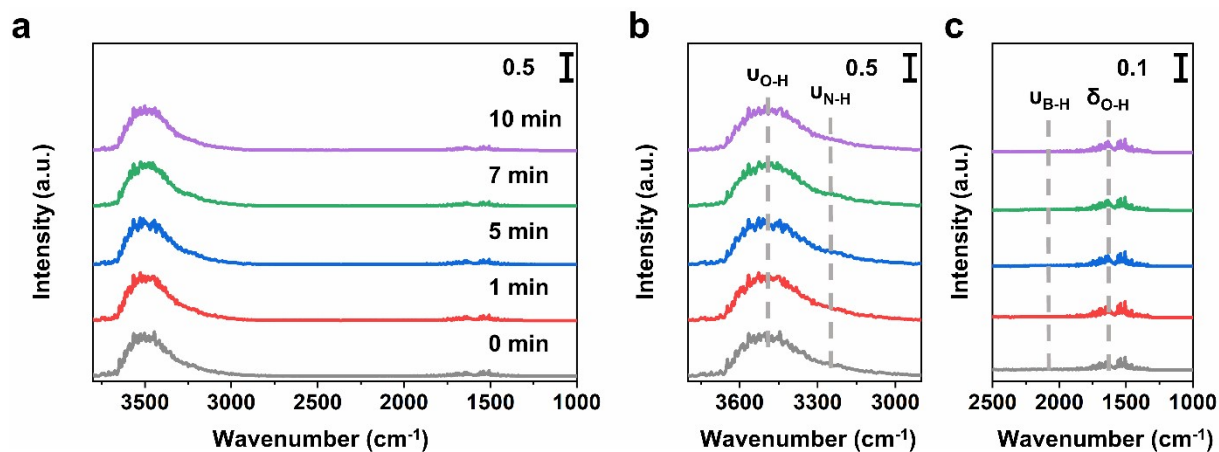

**Fig. S17.** *In situ* FT-IR spectra of AB hydrolysis reaction on KBr sample recorded in (a) 3800–1000 cm<sup>-1</sup>, (b) 3800–2900 cm<sup>-1</sup> and (c) 2500–1000 cm<sup>-1</sup> by flowing AB solution as a reaction gas and He as a purge gas after 0, 1, 5, 7 and 10 min, respectively.

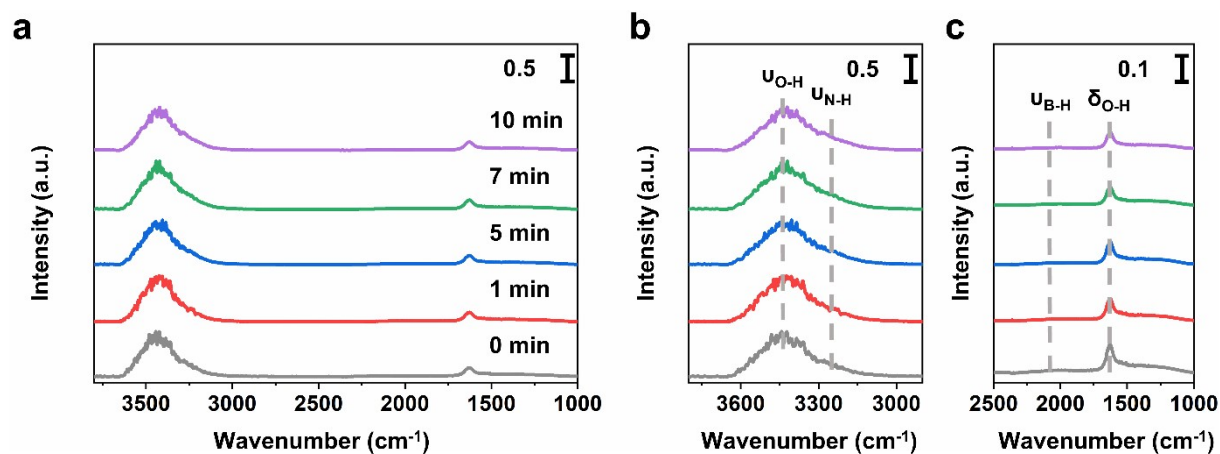

**Fig. S18.** *In situ* FT-IR spectra of AB hydrolysis reaction on Ni/ZrO<sub>x</sub>-300 sample recorded in (a) 3800–1000 cm<sup>-1</sup>, (b) 3800–2900 cm<sup>-1</sup> and (c) 2500–1000 cm<sup>-1</sup> by flowing AB solution as a reaction gas and He as a purge gas after 0, 1, 5, 7 and 10 min, respectively.

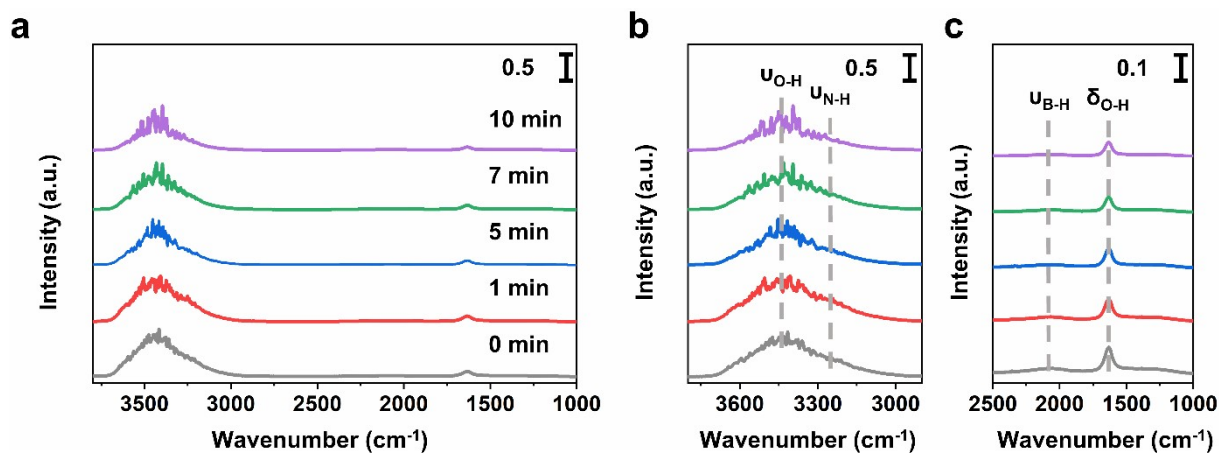

**Fig. S19.** *In situ* FT-IR spectra of AB hydrolysis reaction on Ni/ZrO<sub>x</sub>-400 sample recorded in (a) 3800–1000 cm<sup>-1</sup>, (b) 3800–2900 cm<sup>-1</sup> and (c) 2500–1000 cm<sup>-1</sup> by flowing AB solution as a reaction gas and He as a purge gas after 0, 1, 5, 7 and 10 min, respectively.

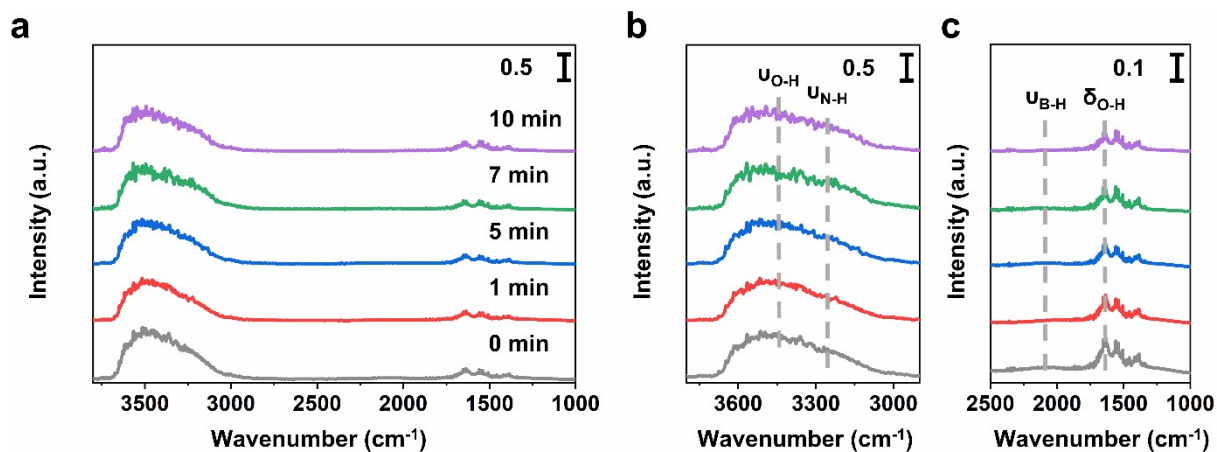

**Fig. S20.** *In situ* FT-IR spectra of AB hydrolysis reaction on Ni/ZrO<sub>x</sub>-600 sample recorded in (a) 3800–1000 cm<sup>-1</sup>, (b) 3800–2900 cm<sup>-1</sup> and (c) 2500–1000 cm<sup>-1</sup> by flowing AB solution as a reaction gas and He as a purge gas after 0, 1, 5, 7 and 10 min, respectively.

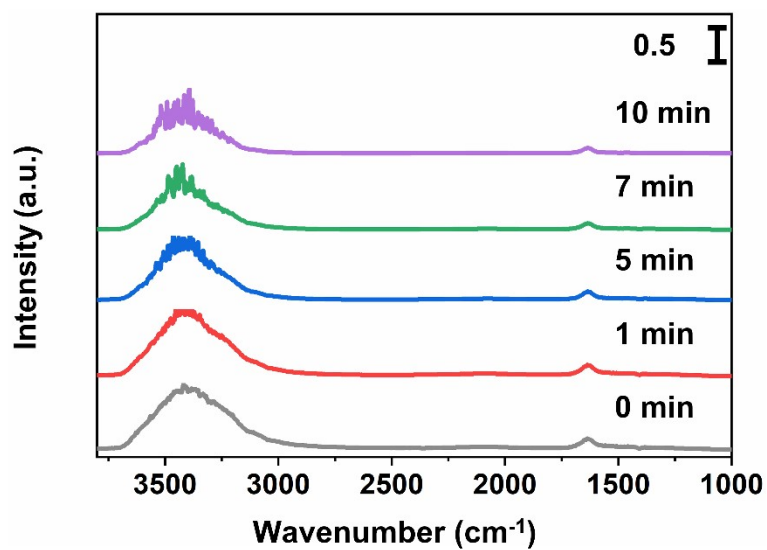

**Fig. S21.** *In situ* FT-IR spectra of AB hydrolysis reaction on Ni/ZrO<sub>x</sub>-500 sample recorded in 3800–1000 cm<sup>-1</sup> by flowing AB solution as a reaction gas and He as a purge gas after 0, 1, 5, 7 and 10 min, respectively.

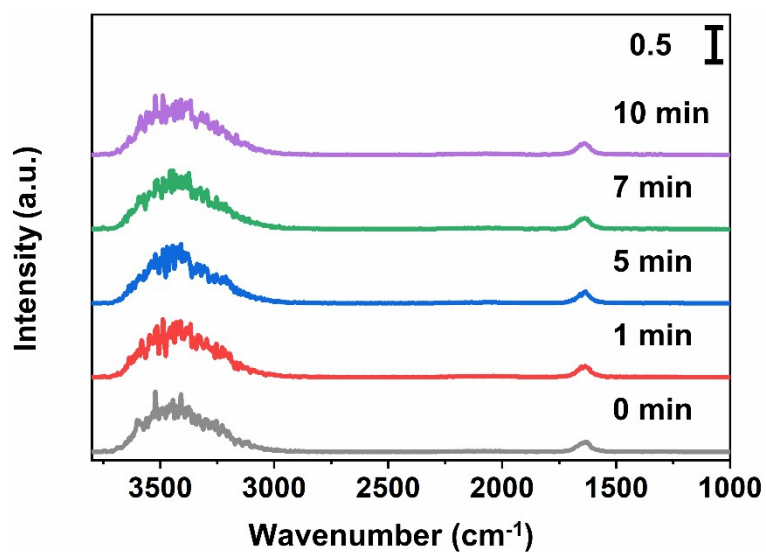

**Fig. S22.** *In situ* FT-IR spectra of ZrO<sub>x</sub>-500 sample recorded in 3800–1000 cm<sup>-1</sup> by flowing pure H<sub>2</sub>O with He as a purge gas after 0, 1, 5, 7 and 10 min, respectively.

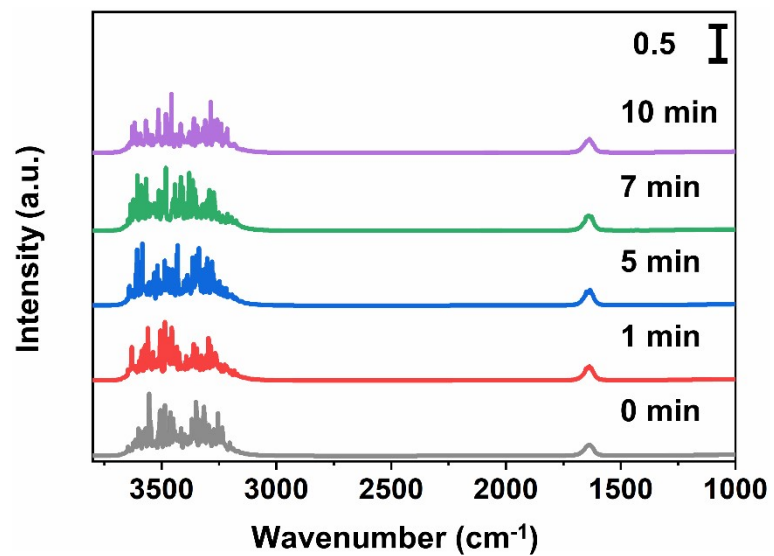

**Fig. S23.** *In situ* FT-IR spectra of Ni/ZrO<sub>x</sub>-500 sample recorded in 3800–1000 cm<sup>-1</sup> by flowing pure H<sub>2</sub>O with He as a purge gas after 0, 1, 5, 7 and 10 min, respectively.



**Table S1.** Physicochemical properties of Ni/ZrO<sub>x</sub>-T samples

| Entry | Catalyst                 | Ni content (wt. %) <sup>a</sup> | Ni content in the filtration liquid (wt. %) <sup>a</sup> | Zr content in the filtration liquid (wt. %) <sup>a</sup> | Mean particle size of Ni (nm) <sup>b</sup> | Theoretical dispersion degree of Ni <sup>c</sup> |
|-------|--------------------------|---------------------------------|----------------------------------------------------------|----------------------------------------------------------|--------------------------------------------|--------------------------------------------------|
| 1     | Ni/ZrO <sub>x</sub> -300 | 4.579                           | /                                                        | /                                                        | 22.27                                      | 2.28%                                            |
| 2     | Ni/ZrO <sub>x</sub> -400 | 4.667                           | /                                                        | /                                                        | 22.35                                      | 2.27%                                            |
| 3     | Ni/ZrO <sub>x</sub> -500 | 4.453                           | /                                                        | /                                                        | 23.20                                      | 2.19%                                            |
| 4     | Ni/ZrO <sub>x</sub> -600 | 4.516                           | /                                                        | /                                                        | 28.33                                      | 1.79%                                            |

<sup>a</sup> Content of Ni and Zr species was determined by inductively coupled plasma-atomic emission spectroscopy (ICP-AES).

<sup>b</sup> Mean particle size of Ni was determined by HR-TEM analysis over 100 particles for each sample.

<sup>c</sup> Theoretical dispersion of Ni was calculated based on the result of HR-TEM.

**Table S2.** Compositional properties of Ni/ZrO<sub>x</sub>-T samples

| Entry | Catalyst                 | Ni <sup>2+</sup> /(Ni <sup>0</sup> +Ni <sup>2+</sup> ) ratio <sup>a</sup> | Zr <sup>3+</sup> /(Zr <sup>3+</sup> +Zr <sup>4+</sup> ) ratio <sup>b</sup> | O <sub>v</sub> /(O <sub>v</sub> +O <sub>l</sub> +O <sub>s</sub> ) ratio <sup>c</sup> |
|-------|--------------------------|---------------------------------------------------------------------------|----------------------------------------------------------------------------|--------------------------------------------------------------------------------------|
| 1     | Ni/ZrO <sub>x</sub> -300 | 42.10%                                                                    | 32.96%                                                                     | 19.88%                                                                               |
| 2     | Ni/ZrO <sub>x</sub> -400 | 47.28%                                                                    | 60.42%                                                                     | 26.91%                                                                               |
| 3     | Ni/ZrO <sub>x</sub> -500 | 58.13%                                                                    | 84.64%                                                                     | 38.01%                                                                               |
| 4     | Ni/ZrO <sub>x</sub> -600 | 50.41%                                                                    | 75.55%                                                                     | 34.89%                                                                               |

<sup>a</sup> Ni<sup>2+</sup>/(Ni<sup>0</sup>+Ni<sup>2+</sup>) ratio was calculated from Ni 2*p* XPS spectra.

<sup>b</sup> Zr<sup>3+</sup>/(Zr<sup>3+</sup>+Zr<sup>4+</sup>) ratio was calculated from Zr 3*d* XPS spectra.

<sup>c</sup> O<sub>v</sub>/(O<sub>v</sub>+O<sub>l</sub>+O<sub>s</sub>) ratio was calculated from O 1*s* XPS spectra.

**Table S3.** Reaction rates for AB hydrolysis over Ni/ZrO<sub>x</sub>-T and ZrO<sub>x</sub>-T catalysts

| Entry | Sample <sup>a</sup>      | Reaction condition | Reaction rate<br>(mol <sub>H<sub>2</sub></sub> mol <sub>Ni</sub> <sup>-1</sup> min <sup>-1</sup> ) |
|-------|--------------------------|--------------------|----------------------------------------------------------------------------------------------------|
| 1     | Ni/ZrO <sub>x</sub> -300 | 0 M NaOH           | 17.99±0.60                                                                                         |
| 2     | Ni/ZrO <sub>x</sub> -400 | 0 M NaOH           | 19.53±0.73                                                                                         |
| 3     | Ni/ZrO <sub>x</sub> -500 | 0 M NaOH           | 23.13±0.83                                                                                         |
| 4     | Ni/ZrO <sub>x</sub> -600 | 0 M NaOH           | 21.26±0.58                                                                                         |
| 5     | Ni/ZrO <sub>x</sub> -500 | 0.1 M NaOH         | 54.38±3.41                                                                                         |
| 6     | Ni/ZrO <sub>x</sub> -500 | 0.2 M NaOH         | 114.41±2.58                                                                                        |
| 7     | Ni/ZrO <sub>x</sub> -500 | 0.3 M NaOH         | 60.93±2.77                                                                                         |
| 8     | Ni/ZrO <sub>x</sub> -500 | 0.4 M NaOH         | 31.90±2.70                                                                                         |
| 9     | /                        | 0.2 M NaOH         | 0±0                                                                                                |
| 10    | Ni/ZrO <sub>x</sub> -300 | 0.2 M NaOH         | 38.68±3.64                                                                                         |
| 11    | Ni/ZrO <sub>x</sub> -400 | 0.2 M NaOH         | 71.42±2.15                                                                                         |
| 12    | Ni/ZrO <sub>x</sub> -600 | 0.2 M NaOH         | 85.89±3.92                                                                                         |
| 13    | ZrO <sub>x</sub> -300    | 0.2 M NaOH         | 0±0                                                                                                |
| 14    | ZrO <sub>x</sub> -400    | 0.2 M NaOH         | 0±0                                                                                                |
| 15    | ZrO <sub>x</sub> -500    | 0.2 M NaOH         | 0±0                                                                                                |
| 16    | ZrO <sub>x</sub> -600    | 0.2 M NaOH         | 0±0                                                                                                |

<sup>a</sup> Reaction conditions: AB: 3.0 mmol, H<sub>2</sub>O: 10 mL, catalyst: 40.0 mg, temperature: 25 °C.

**Table S4.** Catalytic performance for AB hydrolysis over previously reported heterogeneous catalysts and this work

| Entry | Catalyst                                                 | Temperature (K) | NaOH Concentration (M) | TOF (min <sup>-1</sup> )                             | <i>E<sub>a</sub></i> (kJ mol <sup>-1</sup> ) | Ref.      |
|-------|----------------------------------------------------------|-----------------|------------------------|------------------------------------------------------|----------------------------------------------|-----------|
| 1     | Ni/ZrO <sub>x</sub> -300                                 | 298             | 0.2                    | 38.68±3.64 <sup>a</sup><br>91.86±2.68 <sup>b</sup>   | 38.24                                        | This work |
| 2     | Ni/ZrO <sub>x</sub> -400                                 | 298             | 0.2                    | 71.42±2.15 <sup>a</sup><br>151.03±3.41 <sup>b</sup>  | 31.97                                        | This work |
| 3     | Ni/ZrO <sub>x</sub> -500                                 | 298             | 0.2                    | 114.41±2.58 <sup>a</sup><br>196.82±2.58 <sup>b</sup> | 21.26                                        | This work |
| 4     | Ni/ZrO <sub>x</sub> -600                                 | 298             | 0.2                    | 85.89±3.92 <sup>a</sup><br>170.39±2.77 <sup>b</sup>  | 26.80                                        | This work |
| 5     | CoNi/α-MoC                                               | 298             | 0.5                    | 321.1 <sup>b</sup>                                   | /                                            | 1         |
| 6     | 10Ni30Mo <sub>x</sub> C/γ-Al <sub>2</sub> O <sub>3</sub> | 298             | 1                      | 75.1 <sup>a</sup>                                    | 33.12                                        | 2         |
| 7     | hcp-CuNi/C                                               | 300             | 1                      | 22.64 <sup>a</sup>                                   | 29.92                                        | 3         |
| 8     | Ni/KB                                                    | 298             | 0                      | 7.47 <sup>a</sup>                                    | /                                            | 4         |
| 9     | Ni/CeO <sub>2</sub>                                      | 298             | 0                      | 1.7 <sup>a</sup>                                     | 25                                           | 5         |
| 10    | Ni/CNTs                                                  | 298             | 0                      | 26.2 <sup>a</sup>                                    | 32.3                                         | 6         |
| 11    | NiNPs/ZIF-8                                              | 298             | 0.3                    | 85.7 <sup>a</sup>                                    | 42.70                                        | 7         |
| 12    | Ni/Ti <sub>3</sub> C <sub>2</sub> Tx-4                   | 298             | 0                      | 161.0 <sup>a</sup>                                   | 59.3                                         | 8         |
| 13    | rGO/CoNi-N                                               | 298             | 0                      | 126 <sup>a</sup>                                     | 32.8                                         | 9         |
| 14    | Ni-CeOx/Graphene                                         | 298             | 0                      | 68.2 <sup>a</sup>                                    | 28.9                                         | 10        |
| 15    | Ni NPs@3D-(N)GFs                                         | 303             | 0                      | 41.7 <sup>a</sup>                                    | /                                            | 11        |
| 16    | Ni/SiO <sub>2</sub>                                      | 303             | 0                      | 13.2 <sup>a</sup>                                    | 34.0                                         | 12        |

<sup>a</sup> the initial TOF value was calculated based on the following equation: TOF (h<sup>-1</sup>) = (converted substrate (mmol))/(total metal amount (mmol))(reaction time (h)).

<sup>b</sup> the initial TOF value was calculated based on the following equation: TOF (h<sup>-1</sup>) = (converted substrate (mmol))/(surface atoms of active metal (mmol))(reaction time (h)).

## References

- 1 Y. Ge, X. Qin, A. Li, Y. Deng, L. Lin, M. Zhang, Q. Yu, S. Li, M. Peng, Y. Xu, X. Zhao, M. Xu, W. Zhou, S. Yao and D. Ma, *J. Am. Chem. Soc.*, 2021, 143, 628–33.
- 2 Y. Ren, J. Duan, X. Liu, L. Bian, Y. Fan and B. Liu, *Energ. Fuel.*, 2021, 35, 16222–16231.
- 3 P. Li, R. Chen, Y. Huang, W. Li, S. Zhao and S. Tian, *Appl. Catal. B: Environ.*, 2022, 300, 120725.
- 4 K. Guo, H. Li and Z. Yu, *ACS Appl. Mater. Interfaces*, 2018, 10, 517–525.
- 5 S. Akbayrak, O. Taneroğlu and S. Özkar, *New J. Chem.*, 2017, 41, 6546–6552.
- 6 J. Zhang, C. Chen, W. Yan, F. Duan, B. Zhang, Z. Gao and Y. Qin, *Catal. Sci. Technol.*, 2016, 6, 2112–2119.
- 7 P. Li, K. Aranishi and Q. Xu, *Chem. Commun.*, 2012, 48, 3173–3175.
- 8 B. Mo, S. Li, H. Wen, H. Zhang, H. Zhang, J. Wu, B. Li and H. Hou, *ACS Appl. Mater. Interfaces*, 2022, 14, 16320–16329.
- 9 P. Li, R. Chen, S. Zhao, W. Li, Y. Lin and Y. Yu, *Appl. Catal. B: Environ.*, 2021, 298, 120523.
- 10 Q. Yao, Z. Lu, Y. Yang, Y. Chen, X. Chen and H. Jiang, *Nano Res.*, 2018, 11, 4412–4422.
- 11 M. Mahyari and A. Shaabani, *J. Mater. Chem. A*, 2014, 2, 16652–16659.
- 12 Ö. Metin, S. Özkar and S. Sun, *Nano Res.*, 2020, 3, 676–684.
